# Supplementary material
Source: publisher site journal article supplement (https://www.dovepress.com/article/597243)
Supplement: Supplementary file 1 [file 597243%20Revised%20Supplement%201.docx]

# Supplement 1 - Search strategy

**MEDLINE - Pubmed**

( "Chronic Pain"[Mesh] OR "Pain, Neuropathic"[Mesh] OR "Complex Regional Pain Syndromes"[Mesh] OR "Fibromyalgia"[Mesh] OR "chronic pain" OR "persistent pain" OR "neuropathic pain" OR "complex regional pain syndrome" OR "CRPS" OR "fibromyalgia" ) AND ( "Hyperbaric Oxygenation"[Mesh] OR "hyperbaric oxygen therapy" OR "HBOT" OR "oxygen under pressure" )

Applied filters: Publication date: 2000 – 2025; Language: Dutch, English; Publication type: Randomized Controlled Trial

**EMBASE**

('chronic pain'/exp OR 'chronic pain' OR 'persistent pain' OR 'neuropathic pain'/exp OR 'neuropathic pain' OR 'fibromyalgia'/exp OR fibromyalgia OR 'complex regional pain syndrome'/exp OR 'complex regional pain syndrome' OR crps) AND ('hyperbaric oxygen therapy'/exp OR 'hyperbaric oxygen therapy' OR hbot OR 'oxygen under pressure') AND ([dutch]/lim OR [english]/lim) AND [2000-2025]/py AND [randomized controlled trial]/lim

**CENTRAL - Cochrane Library**

([mh "Chronic Pain"] OR [mh "Pain, Neuropathic"] OR [mh "Complex Regional Pain Syndromes"] OR [mh "Fibromyalgia"] OR "chronic pain" OR "persistent pain" OR "neuropathic pain" OR "complex regional pain syndrome" OR CRPS OR fibromyalgia) AND ([mh "Hyperbaric Oxygenation"] OR "hyperbaric oxygen therapy" OR HBOT OR "oxygen under pressure")

Applied filters: Publication date: 2000-2025; Language: Dutch, English; Publication type: Trials
